# Supplementary material
Source: Elsevier journal article supplement (https://www.sciencedirect.com/science/article/pii/S1885585722000925)
Supplement: mmc1 [file mmc1.pdf]

**SUPPLEMENTARY DATA**

**Table 1 of the supplementary data.** Relationship between past and current physical activity (total and by intensity), and HDL antioxidant capacity adjusted for confounding variables defined as model 1 and model 2 –

|                                                 | Model 1                          |                  |        | Model 2                          |                  |        |
|-------------------------------------------------|----------------------------------|------------------|--------|----------------------------------|------------------|--------|
|                                                 | $\beta$                          | 95%CI            | P      | $\beta$                          | 95% CI           | P      |
| <b>Total physical activity</b>                  |                                  |                  |        |                                  |                  |        |
| <i>Past total LTPA (100 METs x min/d)</i>       | -0.001                           | -0.004, 0.003    | .691   | 0.000                            | -0.004, 0.003)   | .928   |
| <i>Current total LTPA (100 METs x min/d)</i>    | Nonlinear <i>P</i> < .001        |                  |        | Nonlinear <i>P</i> < .001        |                  |        |
| < 400 METs x min/d current total LTPA           | -0.022                           | -0.030, -0.013   | < .001 | -0.021                           | -0.030, -0.012   | < .001 |
| ≥ 400 METs x min/d current total LTPA           | 0.002                            | -0.005, 0.008    | .632   | 0.002                            | -0.005, 0.008    | .554   |
| <b>Physical activity according to intensity</b> |                                  |                  |        |                                  |                  |        |
| <i>Past physical activity practice</i>          |                                  |                  |        |                                  |                  |        |
| Past light LTPA (100 METs-min/d)                | -0.008                           | (-0.016, 0.000)  | .039   | -0.007                           | (-0.016, 0.000)  | .058   |
| Past moderate LTPA (100 METs x min/d)           | 0.001                            | (-0.005, 0.007)  | .677   | 0.002                            | (-0.005, 0.007)  | .587   |
| Past vigorous LTPA (100 METs x min/d)           | 0.001                            | (-0.004, 0.007)  | .638   | 0.002                            | (-0.004, 0.007)  | .515   |
| <i>Current physical activity practice</i>       |                                  |                  |        |                                  |                  |        |
| Current light LTPA (100 METs x min/d)           | -0.011                           | (-0.019, -0.003) | .010   | -0.010                           | (-0.019, -0.003) | .013   |
| Current moderate LTPA (100 METs x min/d)        | Nonlinear <i>P</i> value = 0.042 |                  |        | Nonlinear <i>P</i> value < 0.046 |                  |        |
| < 200 METs x min/d current moderate LTPA        | -0.028                           | (-0.049, -0.007) | .010   | -0.028                           | (-0.049, -0.007) | .011   |
| ≥ 200 METs x min/d current moderate LTPA        | 0.007                            | (-0.005, 0.019)  | .265   | 0.007                            | (-0.005, 0.019)  | .276   |
| Current vigorous LTPA (100 METs x min/d)        | Nonlinear <i>P</i> = .076        |                  |        | Nonlinear <i>P</i> = .083        |                  |        |
| < 200 METs x min/d current vigorous LTPA        | -0.025                           | (-0.043, -0.007) | .007   | -0.024                           | (-0.043, -0.007) | .010   |
| ≥ 200 METs x min/d current vigorous LTPA        | -0.004                           | (-0.012, 0.005)  | .363   | -0.003                           | (-0.012, 0.005)  | .495   |

Model 1, adjusted for age, sex, smoking status, diabetes, high-density lipoprotein cholesterol and low-density lipoprotein cholesterol. Model 2, further adjusted for body mass index. LTPA, leisure time physical activity;  $\beta$ , linear regression coefficient; CI, confidence interval.

**Figure 1 of the supplementary data.**

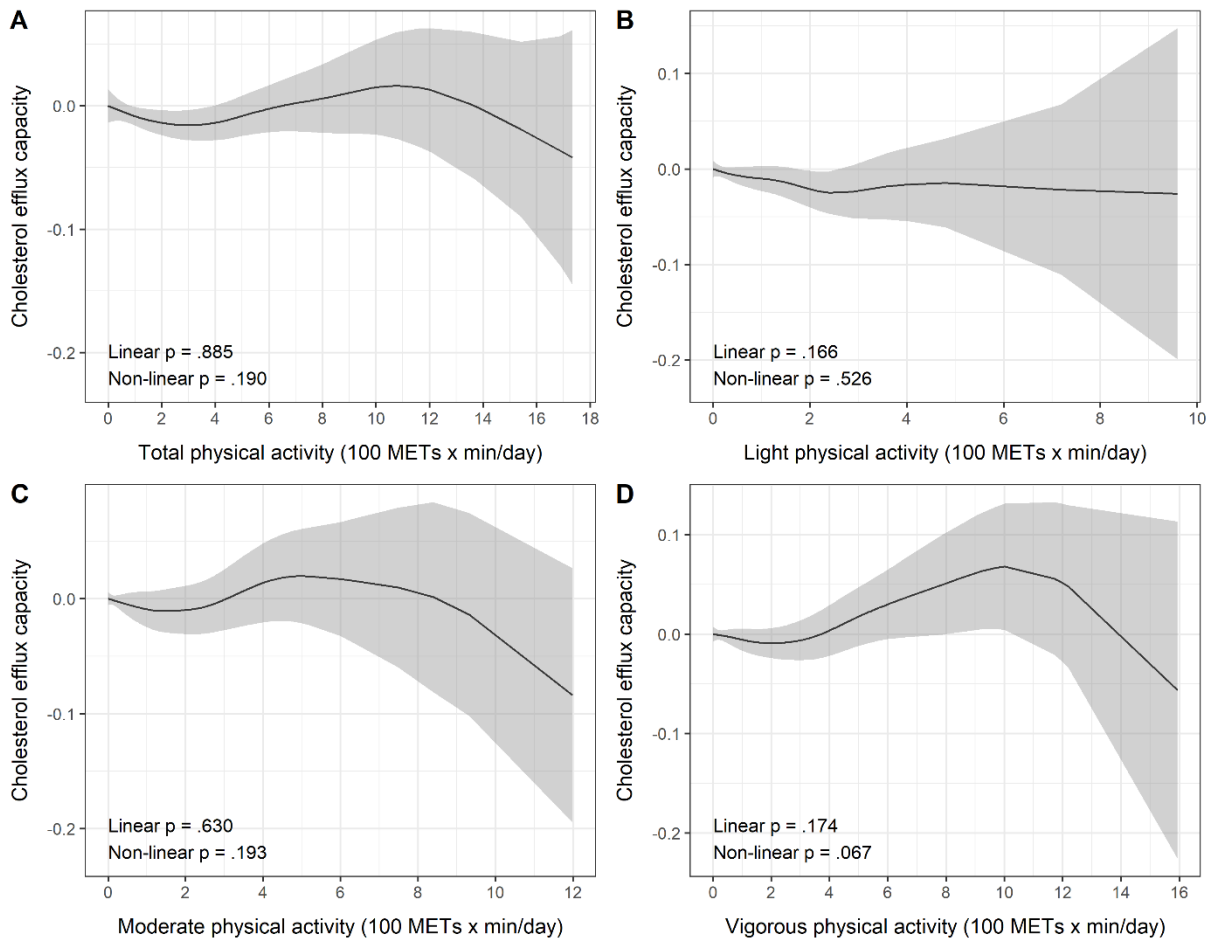

Dose-response association of different intensities of current leisure time physical activity (total, and light-, moderate- and vigorous-intensity [100 METs x min/d]) and cholesterol efflux capacity, assessed by restricted cubic splines. The black line represents the estimated effect size of the association and the grey area the 95% confidence interval.
